# Supplementary material
Source: PubMed Central journal article supplement (PMC4272901)
Supplement: NIHMS641217-supplement-1.pdf [file NIHMS641217-supplement-1.pdf]

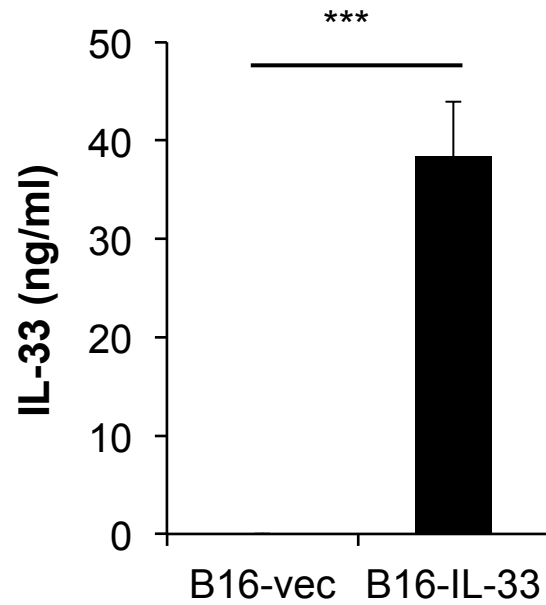

**Supplementary figure 1. IL-33 protein was detected in the culture supernatant from B16-IL-33.**  $4 \times 10^4$  B16-vec or B16-IL-33 cells were respectively seeded into 24 wells in triplicates. The cells were cultured for 2 days, and the supernatants were collected for determining IL-33 expression by the ELISA assay. Data (mean  $\pm$ SEM) are representative of three independent experiments.

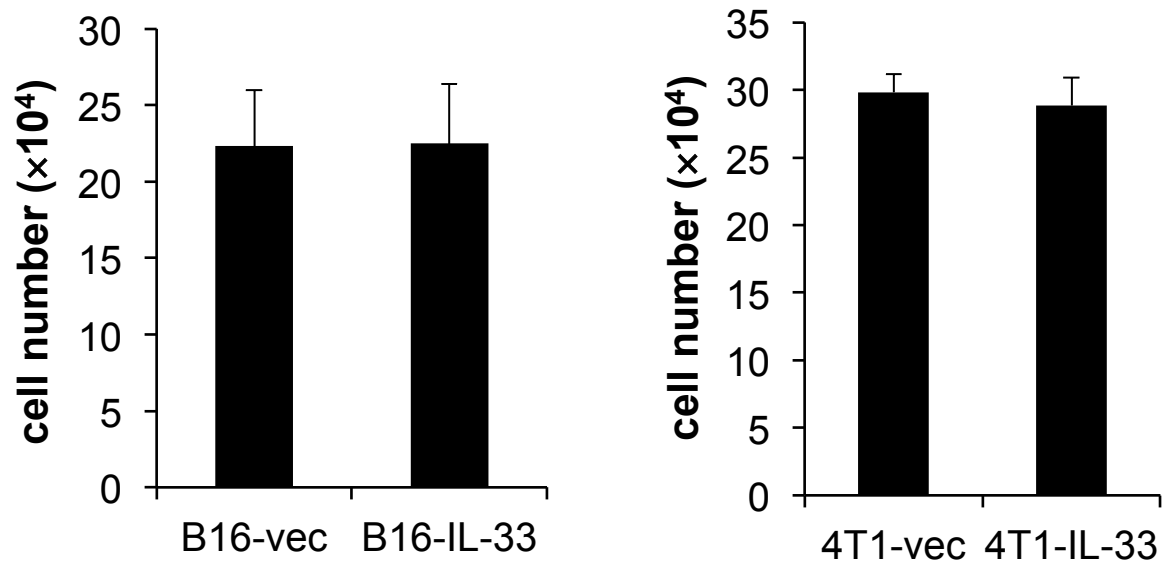

**Supplementary figure 2. IL-33 expression in B16 and 4T1 did not inhibit the proliferation of cell lines.**  $4 \times 10^4$  B16-vec, B16-IL-33, 4T1-vec or 4T1-IL-33 cells were seeded into 24 wells with triplicates. The cells were cultured for 2 days, the number of live cells was determined by live cell counting after cells were stained with Trypan blue. Data (mean  $\pm$ SEM) are representative of three independent experiments.

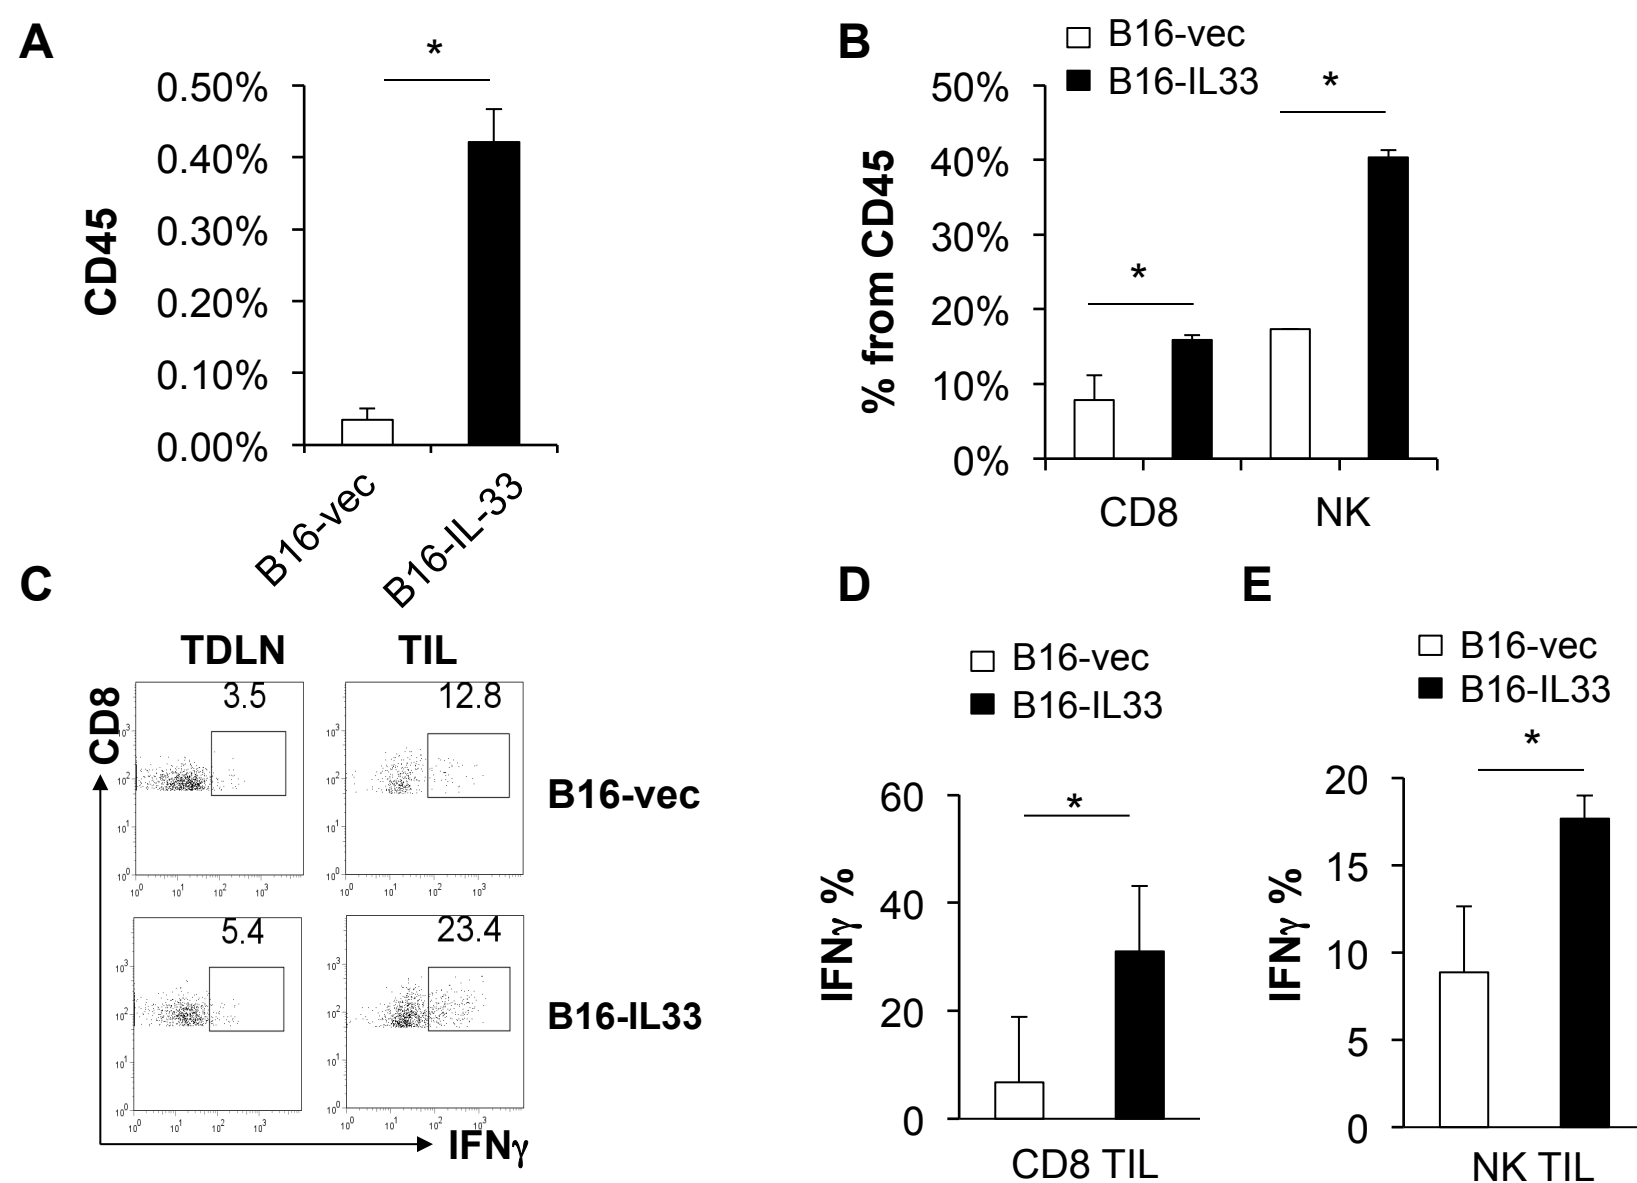

**Supplementary figure 3. Expression of IL-33 in B16 cells sustained type 1 immune responses in later stage of tumor formation.**  $2 \times 10^5$  B16-vector (B16) or B16-IL33 cells were injected i.d. into B6 mice. On day 20, tumors were resected and processed to generate single cell suspension. (A) Percentages of CD45<sup>+</sup> cells in tumor cell suspension. (B) Percentage of CD8<sup>+</sup> or NK1.1<sup>+</sup> cells within the CD45<sup>+</sup> population. (C) Representative flow cytometric plots showing IFN $\gamma$ <sup>+</sup> CD8<sup>+</sup> T cells in tumor draining lymph node (TDLN) or in tumor (TIL). (D) Percentage of IFN $\gamma$ <sup>+</sup> cells in CD8<sup>+</sup> TILs. (E) Percentage of IFN $\gamma$ <sup>+</sup> cells in NK1.1<sup>+</sup> TILs. Results are mean  $\pm$ SEM of three independent experiments. \* $P < 0.05$  and \*\* $P < 0.01$ , two-tailed unpaired Student's t-test.

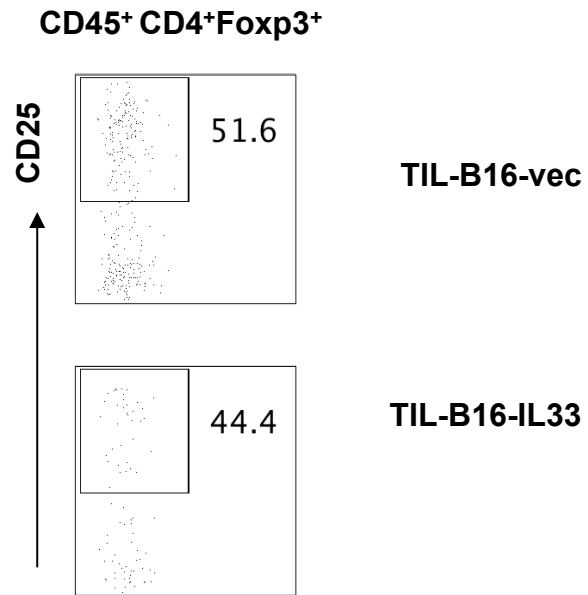

**Supplementary figure 4. Treg in tumors.** Representative flow cytometric analysis of CD25 expression on CD4<sup>+</sup> Foxp3<sup>+</sup> TIL.
